# Supplementary material
Source: Springer Nature journal article supplement (https://www.springermedizin.de/resource/supplementary/12916_2013_981_MOESM4_ESM.pdf/9598756)
Supplement: MOESM4 [file 9598756]

**Supplementary Table 4:** Biological pathways including genes that exhibit differential down-regulated mRNA expression ( $q < 0.05$ ) after palmitate treatment in human pancreatic islets.

| Pathway<br>(total number of genes in the pathway) | Observed<br>number of<br>genes | Expected<br>number of<br>genes | Ratio<br>Observed/<br>expected | Raw<br><i>P</i> -value | Adjusted<br><i>P</i> -value |
|---------------------------------------------------|--------------------------------|--------------------------------|--------------------------------|------------------------|-----------------------------|
| Metabolic pathways (1,026)                        | 113                            | 63.85                          | 1.77                           | $1.57 \times 10^{-09}$ | $1.22 \times 10^{-07}$      |
| Complement and coagulation cascades (67)          | 20                             | 4.17                           | 4.80                           | $2.26 \times 10^{-09}$ | $1.22 \times 10^{-07}$      |
| Glycolysis / Gluconeogenesis (60)                 | 17                             | 3.73                           | 4.55                           | $8.47 \times 10^{-08}$ | $3.43 \times 10^{-06}$      |
| Focal adhesion (196)                              | 33                             | 12.20                          | 2.71                           | $1.58 \times 10^{-07}$ | $4.27 \times 10^{-06}$      |
| Regulation of actin cytoskeleton (204)            | 32                             | 12.70                          | 2.52                           | $1.23 \times 10^{-06}$ | $2.85 \times 10^{-05}$      |
| Pathways in cancer (323)                          | 43                             | 20.10                          | 2.14                           | $2.01 \times 10^{-06}$ | $4.03 \times 10^{-05}$      |
| ECM-receptor interaction (82)                     | 18                             | 5.10                           | 3.53                           | $2.24 \times 10^{-06}$ | $4.03 \times 10^{-05}$      |
| Retinol metabolism (47)                           | 12                             | 2.93                           | 4.10                           | $2.18 \times 10^{-05}$ | 0.0004                      |
| Adherens junction (74)                            | 15                             | 4.61                           | 3.26                           | $4.21 \times 10^{-05}$ | 0.0006                      |
| Lysosome (115)                                    | 19                             | 7.16                           | 2.65                           | $8.47 \times 10^{-05}$ | 0.0011                      |
| Arginine and proline metabolism (51)              | 11                             | 3.17                           | 3.47                           | 0.0002                 | 0.0022                      |
| Pancreatic cancer (71)                            | 13                             | 4.42                           | 2.94                           | 0.0004                 | 0.0038                      |
| O-Glycan biosynthesis (30)                        | 8                              | 1.87                           | 4.28                           | 0.0004                 | 0.0038                      |
| Propanoate metabolism (32)                        | 8                              | 1.99                           | 4.02                           | 0.0006                 | 0.0054                      |
| Fatty acid metabolism (41)                        | 9                              | 2.55                           | 3.53                           | 0.0008                 | 0.0065                      |
| Ascorbate and aldarate metabolism (13)            | 5                              | 0.81                           | 6.18                           | 0.0008                 | 0.0065                      |
| Cell cycle (121)                                  | 17                             | 7.53                           | 2.26                           | 0.0013                 | 0.0096                      |
| One carbon pool by folate (15)                    | 5                              | 0.93                           | 5.36                           | 0.0016                 | 0.0112                      |
| Antigen processing and presentation (55)          | 10                             | 3.42                           | 2.92                           | 0.0019                 | 0.0114                      |
| Tryptophan metabolism (38)                        | 8                              | 2.36                           | 3.38                           | 0.0020                 | 0.0116                      |
| Glutathione metabolism (47)                       | 9                              | 2.93                           | 3.08                           | 0.0022                 | 0.0123                      |
| Butanoate metabolism (32)                         | 7                              | 1.99                           | 3.51                           | 0.0030                 | 0.0157                      |
| Maturity onset diabetes of the young (24)         | 6                              | 1.49                           | 4.02                           | 0.0029                 | 0.0157                      |
| Methane metabolism (6)                            | 3                              | 0.37                           | 8.03                           | 0.0042                 | 0.0206                      |
| Valine, leucine and isoleucine degradation (43)   | 8                              | 2.68                           | 2.99                           | 0.0045                 | 0.0214                      |
| Axon guidance (127)                               | 16                             | 7.90                           | 2.02                           | 0.0055                 | 0.0241                      |
| Linoleic acid metabolism (27)                     | 6                              | 1.68                           | 3.57                           | 0.0055                 | 0.0241                      |
| Arachidonic acid metabolism (54)                  | 9                              | 3.36                           | 2.68                           | 0.0057                 | 0.0243                      |
| Notch signaling pathway (46)                      | 8                              | 2.86                           | 2.79                           | 0.0069                 | 0.0287                      |
| Histidine metabolism (29)                         | 6                              | 1.80                           | 3.32                           | 0.0079                 | 0.0320                      |

|                                     |                                                                                                                                                                                                                                                                                                                                                                                                                                                                                                                                                                                                                                                                                                                                                                                                                                                      |      |      |        |        |
|-------------------------------------|------------------------------------------------------------------------------------------------------------------------------------------------------------------------------------------------------------------------------------------------------------------------------------------------------------------------------------------------------------------------------------------------------------------------------------------------------------------------------------------------------------------------------------------------------------------------------------------------------------------------------------------------------------------------------------------------------------------------------------------------------------------------------------------------------------------------------------------------------|------|------|--------|--------|
| beta-Alanine metabolism (22)        | 5                                                                                                                                                                                                                                                                                                                                                                                                                                                                                                                                                                                                                                                                                                                                                                                                                                                    | 1.37 | 3.65 | 0.0100 | 0.0395 |
| Pyruvate metabolism (40)            | 7                                                                                                                                                                                                                                                                                                                                                                                                                                                                                                                                                                                                                                                                                                                                                                                                                                                    | 2.49 | 2.81 | 0.0109 | 0.0420 |
| <b>Pathway</b>                      | <b>Observed genes</b>                                                                                                                                                                                                                                                                                                                                                                                                                                                                                                                                                                                                                                                                                                                                                                                                                                |      |      |        |        |
| Metabolic pathways                  | <i>UQCRB, GALNT12, MCCC1, NDUFB5, ASS1, CDIPT, GLUL, SDHA, PPAP2A, ADI1, ACSS2, PNLIPRP2, PAPSS1, ALDH1A3, CMPK1, DPYD, AMACR, AHCYLI, DLD, NDUFS2, GATM, DNMT1, UGT2B10, PDHA1, PLA2G7, LAP3, GALNT5, ACO1, HSD17B2, RRM2, GALNT7, IDH1, PLA2G10, CYP4F3, ANPEP, PRIM1, MAN2A2, PON2, TCIRG1, FBP1, NNT, CYP3A5, BDH2, MAOA, TYMS, PIK3C2B, ST3GAL1, LTA4H, ALDOB, ATP6V0E1, NDUFS1, PGM2, SORD, CYP2J2, DHCR24, ASAH1, NDUFA4, RPE, DHRS3, ADH5, MAT2B, GALNT1, GART, FUT2, HSD11B1, PNLIP, CTPS, CHST4, ALDH7A1, ST6GALNAC1, AGL, ALDH3A2, PIGS, FDFT1, ADH1A, ADH6, PCCB, CPS1, B3GNT2, ALDH2, SHMT1, ALG6, AMD1, RDH10, AKR1B10, TBXAS1, SCP2, GCNT3, HGSNAT, POLD3, CYP2C18, CYP3A4, B3GALT5, ADH1C, CAT, ACSS3, HGD, HGD, CYP4F2, PAH, PPAP2B, ACOX1, P4HA3, DHFR, UGT2A3, ACADM, PLD1, HK1, ACSS1, AFMID, PTDSSI, HIBADH, ACSM3, PIP5K1B</i> |      |      |        |        |
| Complement and coagulation cascades | <i>C3, CFH, KLKB1, C6, TFPI, CFI, PLAT, F11, C1QB, SERPINA5, CD59, PLAU, SERPING1, C1QC, CFB, CFB, F2R, C4BPA, BDKRB2, THBD, C3AR1</i>                                                                                                                                                                                                                                                                                                                                                                                                                                                                                                                                                                                                                                                                                                               |      |      |        |        |
| Glycolysis / Gluconeogenesis        | <i>ADH5, ADH1A, PDHA1, ADH6, ALDH2, PGM2, ACSS2, FBP1, ALDH1A3, ALDH7A1, GALM, HK1, DLD, ACSS1, ALDOB, ALDH3A2, ADH1C</i>                                                                                                                                                                                                                                                                                                                                                                                                                                                                                                                                                                                                                                                                                                                            |      |      |        |        |
| Focal adhesion                      | <i>FNI, DOCK1, KDR, EGF, ERBB2, PDGFRA, PPP1CC, COL6A3, SPP1, LAMA3, IGF1R, IGF1R, CTNBN1, ITGB3, COL4A1, ITGB6, CAV2, PDGFRB, LAMA4, LAMC1, COL5A2, AKT2, COL1A1, ITGA4, PIK3R1, ITGA5, LAMA2, LAMB1, PDGFD, ACTN4, HGF, ITGAV, COL1A2, MAPK1</i>                                                                                                                                                                                                                                                                                                                                                                                                                                                                                                                                                                                                   |      |      |        |        |
| Regulation of actin cytoskeleton    | <i>FNI, DOCK1, EGF, ENAH, NCKAP1, DIAPH3, PDGFRA, PPP1CC, FGF19, IQGAP2, ITGB3, ITGB6, F2R, LIMK2, CFL1, PDGFRB, CYFIP1, ITGA4, PIK3R1, EZR, ITGA5, KRAS, ARHGEF12, ITGB2, FGFR2, CSK, ACTN4, PDGFD, ITGAV, MAPK1, BDKRB2, PIP5K1B</i>                                                                                                                                                                                                                                                                                                                                                                                                                                                                                                                                                                                                               |      |      |        |        |
| Pathways in cancer                  | <i>FNI, MTOR, EGF, ERBB2, TGFBR1, PDGFRA, TGFBR2, FGF19, CCNE1, WNT5A, PIAS1, LAMA3, IGF1R, IGF1R, CTNBN1, CDH1, MIF, COL4A1, PDGFRB, LAMA4, LAMC1, AKT2, ACVR1B, PIK3R1, SKP2, KRAS, LAMA2, TCF7L2, SMAD3, JAK1, HIF1A, CCDC6, NCOA4, FGFR2, LAMB1, STAT1, HDAC1, KITLG, HGF, PLD1, ITGAV, MAPK1, ARNT, HDAC2</i>                                                                                                                                                                                                                                                                                                                                                                                                                                                                                                                                   |      |      |        |        |
| ECM-receptor interaction            | <i>LAMA4, COL5A2, LAMC1, FNI, ITGA4, COL1A1, ITGA5, LAMA2, SDC1, COL6A3, SPP1, LAMA3, LAMB1, ITGB3, COL4A1, ITGAV, COL1A2, ITGB6</i>                                                                                                                                                                                                                                                                                                                                                                                                                                                                                                                                                                                                                                                                                                                 |      |      |        |        |
| Retinol metabolism                  | <i>ADH5, ADH1A, ADH6, CYP1A1, RDH10, CYP3A5, UGT2A3, DHRS3, CYP2C18, CYP3A4, UGT2B10, ADH1C</i>                                                                                                                                                                                                                                                                                                                                                                                                                                                                                                                                                                                                                                                                                                                                                      |      |      |        |        |

|                                            |                                                                                                                                          |
|--------------------------------------------|------------------------------------------------------------------------------------------------------------------------------------------|
| Adherens junction                          | <i>SMAD3, INSR, IGF1R, IGF1R, CTNND1, CDH1, ACVR1B, ERBB2, ACTN4, TGFBRI, CTNND1, MAPK1, TGFBR2, SNAI2, TCF7L2, FARP2</i>                |
| Lysosome                                   | <i>LAMP1, CTSE, ASAH1, HGSNAT, AP3S1, LIPA, CTSS, AP1M2, ENTPD4, TCIRG1, CTSC, CTSS, GNPTAB, LAPTM5, LAPTM4B, CTSA, CTSD, CTSH, ACP5</i> |
| Arginine and proline metabolism            | <i>CPS1, ALDH2, LAP3, P4HA3, AMD1, MAOA, ASS1, ALDH7A1, GATM, GLUL, ALDH3A2</i>                                                          |
| Pancreatic cancer                          | <i>SMAD3, JAK1, ACVR1B, AKT2, PIK3R1, EGF, STAT1, ERBB2, TGFBRI, KRAS, PLD1, MAPK1, TGFBR2</i>                                           |
| O-Glycan biosynthesis                      | <i>PCCB, ACSS3, ALDH2, ACSS2, ALDH7A1, ACADM, ACSS1, ALDH3A2</i>                                                                         |
| Propanoate metabolism                      | <i>ADH5, ADH1A, ADH6, ALDH2, ACOX1, ALDH7A1, ACADM, ALDH3A2, ADH1C</i>                                                                   |
| Fatty acid metabolism                      | <i>ADH5, ADH1A, ADH6, ALDH2, ACOX1, ALDH7A1, ACADM, ALDH3A2, ADH1C</i>                                                                   |
| Ascorbate and aldarate metabolism          | <i>ALDH7A1, UGT2A3, ALDH2, ALDH3A2, UGT2B10</i>                                                                                          |
| Cell cycle                                 | <i>PRKDC, SKP2, CHEK1, CCNB1, MCM7, CDC2, CCNE1, SMAD3, CCNA2, PCNA, TTK, HDAC1, ATR, TFDP2, CCNB2, HDAC2, YWHAB</i>                     |
| One carbon pool by folate                  | <i>DHFR, TYMS, GART, SHMT1, MTFMT</i>                                                                                                    |
| Antigen processing and presentation        | <i>HLA-DRA, HLA-DRA, HLA-DMA, HLA-DMA, HLA-DMA, CTSS, HLA-DMB, HLA-DMB, IFI30, B2M, RFX5, CREB1, HLA-DPB1, CD74</i>                      |
| Tryptophan metabolism                      | <i>MAOA, CAT, ALDH7A1, ALDH2, CYP1A1, AFMID, ALDH3A2, CYP1B1</i>                                                                         |
| Glutathione metabolism                     | <i>GSTK1, GSTM2, LAP3, GPX2, RRM2, IDH1, MGST1, GSTA1, ANPEP</i>                                                                         |
| Butanoate metabolism                       | <i>PDHA1, ALDH7A1, ALDH2, ALDH3A2, AKR1B10, ACSM3, BDH2</i>                                                                              |
| Maturity onset diabetes of the young       | <i>HHEX, NKX2-2, NR5A2, HNF4G, HNF1B, NEUROD1</i>                                                                                        |
| Methane metabolism                         | <i>ADH5, CAT, SHMT1</i>                                                                                                                  |
| Valine, leucine and isoleucine degradation | <i>PCCB, ALDH2, MCCC1, ALDH7A1, ACADM, DLD, ALDH3A2, HIBADH</i>                                                                          |
| Axon guidance                              | <i>EFNB2, ROBO1, ARHGEF12, KRAS, SEMA6D, PLXNB2, SEMA6A, CDK5, ABLIM1, NCK2, NTN4, NRP1, MAPK1, CFLI, LIMK2, CHP</i>                     |
| Linoleic acid metabolism                   | <i>CYP2J2, PLA2G10, CYP2C18, CYP3A4, AKR1B10, CYP3A5</i>                                                                                 |
| Arachidonic acid metabolism                | <i>CYP4F2, CYP2J2, GPX2, TBXAS1, LTA4H, AKR1C3, PLA2G10, CYP4F3, CYP2C18</i>                                                             |
| Notch sigling pathway                      | <i>HDAC1, NOTCH3, JAG1, NOTCH2, LFNG, PSEN1, HDAC2, DTX4</i>                                                                             |
| Histidine metabolism                       | <i>MAOA, ALDH7A1, ALDH2, HNMT, ALDH3A2, ALDH1A3</i>                                                                                      |

|                         |                                                          |
|-------------------------|----------------------------------------------------------|
| beta-Alanine metabolism | <i>ALDH7A1, ACADM, ALDH2, DPYD, ALDH3A2</i>              |
| Pyruvate metabolism     | <i>PDHA1, ALDH7A1, ALDH2, ACSS2, ACSS1, DLD, ALDH3A2</i> |
